# Supplementary material
Source: PubMed Central journal article supplement (PMC2544583)
Supplement: 0804507105_0804507105SI.pdf [file 0804507105_0804507105SI.pdf]

# Supporting Information

Chung *et al.* 10.1073/pnas.0804507105

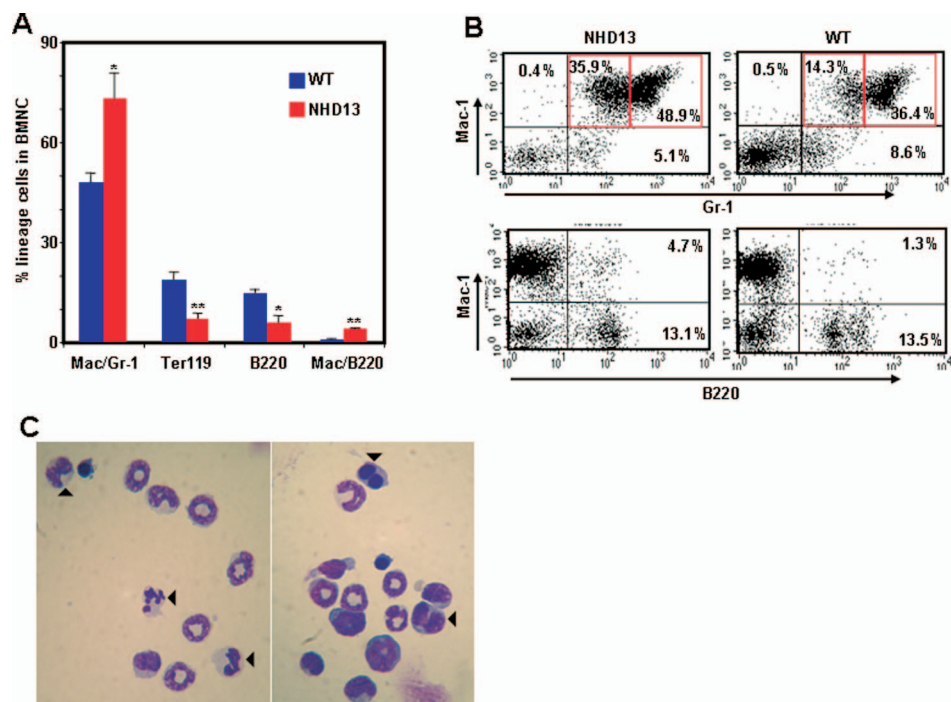

**Fig. S1.** Immunophenotype and morphology of BMNC. (A) Lineage distribution of WT and NHD13 donor BMNC (six of each genotype). Mean  $\pm$  SEM is displayed. (B) Representative FACS profiles for Mac-1/Gr-1 staining of BMNC. Note the increase in Mac1+Gr1dim cells in the NHD13 BM. (C) MGG staining of BM from NHD13 donors. Arrowheads indicate dysplastic cells. \*,  $P < 0.05$ ; \*\*,  $P < 0.01$ .



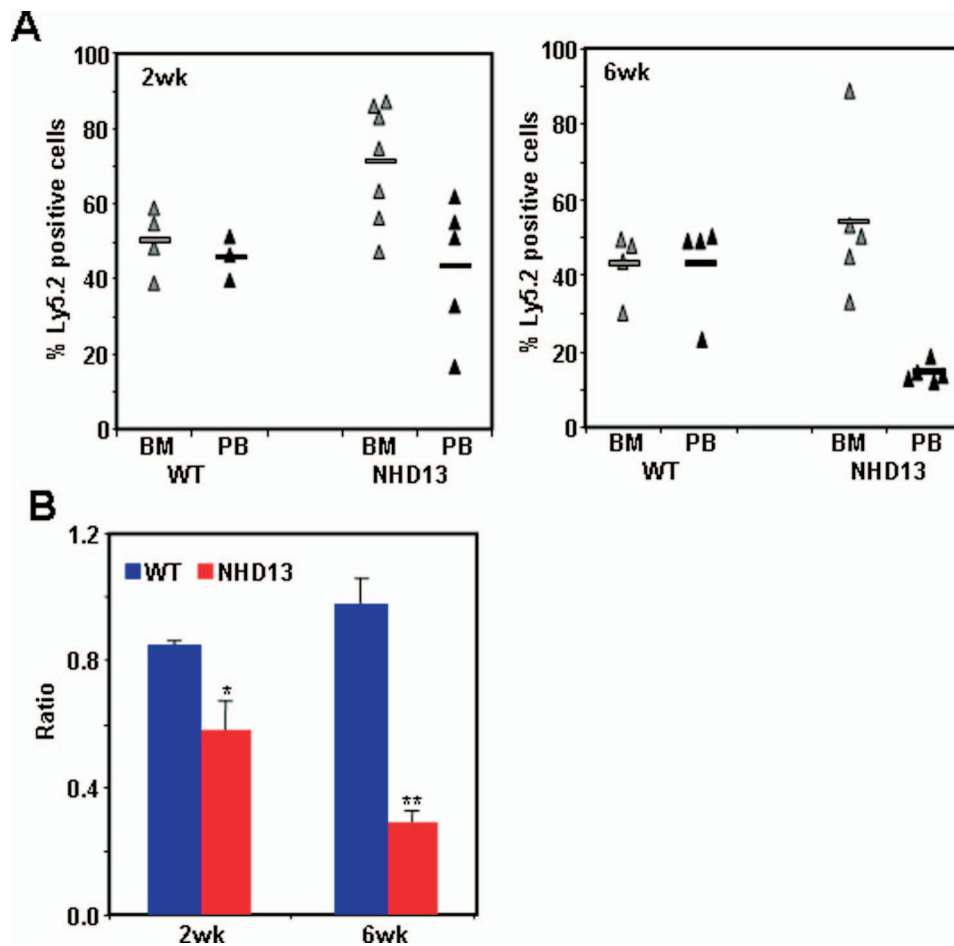

**Fig. S3.** Competitive repopulation assay. Lethally irradiated recipient mice (Ly5.1+) received  $1 \times 10^5$  donor BMNC cells (Ly5.2+) together with  $1 \times 10^5$  competitor BMNC cells (Ly5.1+). Recipient mice were sacrificed at 2 and 6 weeks after transplantation for analysis of engraftment in the PB and BM. (A) Percent engraftment of donor origin in PB and BM of recipients. (B) The engraftment ratio of PB versus BM. Error bars, SEM; \*,  $P < 0.05$ ; \*\*,  $P < 0.01$ .







**Table S1. Hematologic features of BMT donors**

| Donor             | Peripheral CBC                      |              |            |                                      |                                      |                                        |                                       | Bone Marrow                               |           |
|-------------------|-------------------------------------|--------------|------------|--------------------------------------|--------------------------------------|----------------------------------------|---------------------------------------|-------------------------------------------|-----------|
|                   | RBC<br>(millions per<br>microliter) | HGB,<br>g/dl | MCV, fl    | PLT<br>(thousands<br>per microliter) | WBC<br>(thousands<br>per microliter) | Polys<br>(thousands<br>per microliter) | Lym,<br>(thousands<br>per microliter) | No. of cells<br>( $\times 10^6$ per 2f2t) | Blast, %  |
| NHD13 ( $n = 6$ ) | 7.56*                               | 11.57*       | 56.15**    | 720.0                                | 3.48**                               | 1.08*                                  | 1.77**                                | 66.8                                      | 11.9      |
| SD                | $\pm 2.27$                          | $\pm 2.74$   | $\pm 7.12$ | $\pm 460.3$                          | $\pm 1.50$                           | $\pm 0.74$                             | $\pm 0.66$                            | $\pm 7.12$                                | $\pm 2.9$ |
| WT ( $n = 6$ )    | 10.62                               | 14.93        | 44.38      | 1254.2                               | 10.87                                | 2.44                                   | 7.13                                  | 72.6                                      | 9.9       |
| SD                | $\pm 2.50$                          | $\pm 2.06$   | $\pm 1.87$ | $\pm 578.5$                          | $\pm 1.88$                           | $\pm 1.00$                             | $\pm 2.77$                            | $\pm 1.06$                                | $\pm 3.4$ |

2f2t, two femora and two tibiae.

\*,  $P < 0.05$ ; \*\*,  $P < 0.01$ .

**Table S2. Nonirradiated recipient mice transplanted with BMNC from *NHD13* or WT mice**

| Mouse ID                       | HGB, g/dl | MCV, fl | PLT<br>(thousands<br>per microliter) | WBC<br>(thousands<br>per microliter) | Polys<br>(thousands<br>per microliter) | Lym<br>(thousands<br>per microliter) | Ly5.2 positive cells, % |                     |                 |
|--------------------------------|-----------|---------|--------------------------------------|--------------------------------------|----------------------------------------|--------------------------------------|-------------------------|---------------------|-----------------|
|                                |           |         |                                      |                                      |                                        |                                      | PB                      | Spleen <sup>†</sup> | BM <sup>†</sup> |
| 16 weeks after transplantation |           |         |                                      |                                      |                                        |                                      |                         |                     |                 |
| NHD13 #1                       | 14.90     | 44.20   | 823.00                               | 10.80                                | 2.86                                   | 7.73                                 | 0.46                    | 0.55                | 1.44            |
| NHD13 #2                       | 15.30     | 43.50   | 882.00                               | 11.24                                | 2.81                                   | 8.01                                 | 0.58                    |                     |                 |
| NHD13 #3                       | 16.40     | 44.00   | 801.00                               | 10.52                                | 2.54                                   | 7.70                                 | 0.56                    |                     |                 |
| Mean                           | 15.53     | 43.90   | 835.33                               | 10.85                                | 2.74                                   | 7.81                                 | 0.53                    |                     |                 |
| SD                             | ±0.78     | ±0.36   | ±41.88                               | ±0.36                                | ±0.17                                  | ±0.17                                | ±0.06                   |                     |                 |
| WT#1                           | 14.60     | 43.60   | 721.00                               | 10.68                                | 2.77                                   | 7.72                                 | 0.26                    | 0.30                | 0.57            |
| WT#2                           | 16.40     | 43.00   | 783.00                               | 12.90                                | 3.93                                   | 8.37                                 | 0.24                    |                     |                 |
| WT#3                           | 16.00     | 42.00   | 815.00                               | 11.30                                | 3.32                                   | 7.65                                 | 1.19                    |                     |                 |
| Mean                           | 15.67     | 42.87   | 773.00                               | 11.63                                | 3.34                                   | 7.91                                 | 0.56                    |                     |                 |
| SD                             | ±0.95     | ±0.81   | ±47.79                               | ±1.15                                | ±0.58                                  | ±0.40                                | ±0.54                   |                     |                 |
| 58 weeks after transplantation |           |         |                                      |                                      |                                        |                                      |                         |                     |                 |
| NHD13 #1                       | 15.30     | 46.90   | 748.00                               | 14.58                                | 4.51                                   | 9.58                                 | 0.47                    |                     |                 |
| NHD13 #2                       | 15.90     | 47.00   | 946.00                               | 9.72                                 | 2.41                                   | 6.98                                 | 0.56                    |                     |                 |
| Mean                           | 15.60     | 46.95   | 847.00                               | 12.15                                | 3.46                                   | 8.28                                 | 0.52                    |                     |                 |

The recipient received  $1 \times 10^6$  of BMNC. CBCs were acquired from the recipient mice at 16 and 58 weeks after transplantation.

<sup>†</sup>The recipients were killed at 17 weeks after transplantation.



**Table S3. Clinical outcome of secondary transplant recipient mice**

| ID   | Health status | Weeks<br>(post-Tx) | Blasts*, % | WBC (thousands<br>per microliter) | HGB, g/dl | MCV, fl | PLT (thousands<br>per microliter) | Diagnosis |
|------|---------------|--------------------|------------|-----------------------------------|-----------|---------|-----------------------------------|-----------|
| P#1  | Morbid        | 17                 | 26.1       | 20.3                              | 11.3      | 59.9    | 97                                | AML       |
| P#2  | Morbid        | 17                 | 47.4       | 6.42                              | 11.9      | 61.3    | 406                               | AML       |
| P#3  | f.d.          | 32                 | ND         | ND                                | ND        | ND      | ND                                | Unknown   |
| P#4  | Morbid        | 16                 | 21.3       | 40.4                              | 9.5       | 59.5    | 411                               | AML       |
| P#5  | f.d.          | 23                 | ND         | ND                                | ND        | ND      | ND                                | Unknown   |
| 2P#1 | f.d.          | 24                 | ND         | ND                                | ND        | ND      | ND                                | Unknown   |
| 2P#2 | Morbid        | 17                 | 38.5       | 22.8                              | 12.3      | 60.1    | 649                               | AML       |
| 2P#3 | Morbid        | 32                 | 23.6       | 47.22                             | 7.5       | 70.6    | 525                               | AML       |
| 2P#4 | Morbid        | 22                 | 23.75      | ND                                | ND        | ND      | ND                                | AML       |
| 2P#5 | f.d.          | 14                 | ND         | ND                                | ND        | ND      | ND                                | Unknown   |

f.d., found dead; ND, not done; post-Tx, after transplantation.

\*Percentage of blasts in bone marrow.
